# Supplementary material
Source: MDPI journal article supplement (https://www.mdpi.com/2071-1050/10/10/3485)
Supplement: s1 [file s1]

**1. Fixed-response questions presented to farmers to assess their opinions on GGP.**

1. What is the level of your understanding about the Grain for Green Program (GGP)?
  - 1) Very well.
  - 2) Well.
  - 3) General.
  - 4) A little.
  - 5) Not at all.
2. Did you Participated in the GGP?
  - 1) Yes (Please answer question 3).
    - When did you participate the GGP?
    - How many of your cropland were returned to forest?
  - 2) No (Please answer question 4)
3. Did the quality of environment improved after the implementation of GGP?
  - 1) Improved.
  - 2) No change.
  - 3) Declined.
4. The reason for not participating the GGP.
  - 1) Willing to participate, but cropland was not included in the planned areas.
  - 2) Unwilling to participate, because the payment from government cannot compensate the loss of income.
  - 3) Don't know the GGP.
5. Do you concern about the local environmental protection issues?
  - 1) Very concern.
  - 2) Concern.
  - 3) Generally.
  - 4) A little.
  - 5) Not at all.
6. Do you know that GGP plays an important role in environmental protection?
  - 1) Very concern.
  - 2) Concern.
  - 3) Generally.
  - 4) A little.
  - 5) Not at all.
7. Is it good or not to participate GGP?

1) GOOD.

- Planting trees makes more money.
- Subsidies.
- Non-agricultural activities rather than agriculture are the main income source.
- Traditions and life style haven't been influenced.
- Protecting environment.

2) BAD.

- Income was reduced by return limited cropland.
- The ownership of cropland might be changed after participating GGP.
- Traditions and life style changed by GGP.
- Traditional diet and activity space are changed.
- The quality of environmental is not improved.

## **2. Outline of questions for interviewees (Village managers)**

1. What is main resource of income?
2. How about the residents' willingness of participation for GGP?
3. Does the GGP improve the environmental quality?
4. Does the GGP improve the income or life standard?
5. What is the response of residents to GGP?

## **3. Confusion matrix of the land use classification**

**Table S1.** Confusion matrix of the land use classification in 1993. The values in the table are the number of the pixels.

|                        |                         | Actual class |        |           |                  |       |                             |                     |                          |
|------------------------|-------------------------|--------------|--------|-----------|------------------|-------|-----------------------------|---------------------|--------------------------|
|                        |                         | Cropland     | Forest | Grassland | Residential area | Water | Total                       | User's accuracy (%) | Errors of commission (%) |
| Predicted class        | Cropland                | 2791         | 260    | 156       | 97               | 160   | 3464                        | 80.57               | 19.43                    |
|                        | Forest                  | 293          | 4091   | 314       | 0                | 79    | 4793                        | 85.35               | 14.65                    |
|                        | Grassland               | 51           | 184    | 2108      | 18               | 14    | 2375                        | 88.76               | 11.24                    |
|                        | Residential area        | 0            | 0      | 0         | 1289             | 1     | 1290                        | 99.92               | 0.08                     |
|                        | Water                   | 0            | 0      | 0         | 4                | 2230  | 2234                        | 80.57               | 0.18                     |
|                        | Total                   | 3135         | 4535   | 2578      | 1424             | 2484  | 14, 156                     |                     |                          |
|                        | Producer's accuracy (%) | 89.03        | 90.21  | 81.77     | 90.52            | 89.77 | Overall accuracy = 88.3654% |                     |                          |
| Errors of omission (%) |                         | 10.97        | 9.79   | 18.23     | 9.48             | 10.23 | Kappa coefficient = 0.8489  |                     |                          |

**Table S2.** Confusion matrix of the land use classification in 1999. The values in the table are the number of the pixels.

|                        |                         | Actual class |        |           |                  |       |                             |                     |                          |
|------------------------|-------------------------|--------------|--------|-----------|------------------|-------|-----------------------------|---------------------|--------------------------|
|                        |                         | Cropland     | Forest | Grassland | Residential area | Water | Total                       | User's accuracy (%) | Errors of commission (%) |
| Predicted class        | Cropland                | 2674         | 271    | 90        | 157              | 293   | 3485                        | 76.73               | 23.27                    |
|                        | Forest                  | 328          | 3913   | 257       | 5                | 18    | 4521                        | 86.55               | 13.45                    |
|                        | Grassland               | 14           | 149    | 1918      | 0                | 4     | 2085                        | 91.99               | 8.01                     |
|                        | Residential area        | 0            | 0      | 0         | 1981             | 9     | 1990                        | 99.55               | 0.45                     |
|                        | Water                   | 0            | 0      | 0         | 0                | 2028  | 2028                        | 100                 | 0                        |
|                        | Total                   | 3016         | 4333   | 2265      | 2143             | 2352  | 14,109                      |                     |                          |
|                        | Producer's accuracy (%) | 88.66        | 90.31  | 84.68     | 92.44            | 86.22 | Overall accuracy = 88.6952% |                     |                          |
| Errors of omission (%) |                         | 11.34        | 9.69   | 15.32     | 7.56             | 13.78 | Kappa coefficient = 0.8550  |                     |                          |

**Table S3.** Confusion matrix of the land use classification in 2009. The values in the table are the number of the pixels.

|                 |                         | Actual class |        |           |                  |       |                             |                     |                          |
|-----------------|-------------------------|--------------|--------|-----------|------------------|-------|-----------------------------|---------------------|--------------------------|
|                 |                         | Cropland     | Forest | Grassland | Residential area | Water | Total                       | User's accuracy (%) | Errors of commission (%) |
| Predicted class | Cropland                | 4292         | 410    | 229       | 264              | 146   | 5341                        | 80.36               | 19.64                    |
|                 | Forest                  | 516          | 6855   | 388       | 5                | 322   | 8086                        | 84.78               | 15.22                    |
|                 | Forest                  | 38           | 27     | 3008      | 1                | 3     | 3077                        | 97.76               | 2.24                     |
|                 | Residential area        | 0            | 0      | 0         | 2232             | 0     | 2232                        | 100                 | 0                        |
|                 | Water                   | 0            | 162    | 0         | 1                | 2085  | 2248                        | 92.75               | 7.25                     |
|                 | Total                   | 4846         | 7454   | 3625      | 2503             | 2556  | 20,984                      |                     |                          |
|                 | Producer's accuracy (%) | 88.57        | 91.96  | 82.98     | 89.17            | 81.57 | Overall accuracy = 88.0290% |                     |                          |
|                 | Errors of omission (%)  | 11.43        | 8.04   | 17.02     | 10.83            | 18.43 | Kappa coefficient = 0.8411  |                     |                          |

**Table S4.** Confusion matrix of the land use classification in 2013. The values in the table are the number of the pixels.

|                 |                         | Actual area |        |           |                  |       |                             |                     |                          |
|-----------------|-------------------------|-------------|--------|-----------|------------------|-------|-----------------------------|---------------------|--------------------------|
|                 |                         | Cropland    | Forest | Grassland | Residential area | Water | Total                       | User's accuracy (%) | Errors of commission (%) |
| Predicted class | Cropland                | 8400        | 1282   | 427       | 893              | 280   | 11,282                      | 74.45               | 25.55                    |
|                 | Forest                  | 686         | 7201   | 133       | 12               | 147   | 8179                        | 88.04               | 11.96                    |
|                 | Grassland               | 116         | 160    | 3725      | 6                | 5     | 4012                        | 92.85               | 7.15                     |
|                 | Residential area        | 48          | 0      | 0         | 3697             | 3     | 3748                        | 98.64               | 1.36                     |
|                 | Water                   | 0           | 0      | 0         | 0                | 4229  | 4229                        | 100                 | 0                        |
|                 | Total                   | 9250        | 8643   | 4285      | 4608             | 4664  | 31,450                      |                     |                          |
|                 | Producer's accuracy (%) | 90.81       | 83.32  | 86.93     | 80.23            | 90.67 | Overall accuracy = 86.6518% |                     |                          |
|                 | Errors of omission (%)  | 9.19        | 16.68  | 13.07     | 19.77            | 9.33  | Kappa coefficient = 0.8262  |                     |                          |
